# Supplementary material
Source: HighWire-hosted journal article supplement (https://erj.ersjournals.com/content/52/2/1800616)
Supplement: inline-supplementary-material-1 [file inline-supplementary-material-1.pdf]

## **Supplement**

### **Combined value of exhaled nitric oxide and blood eosinophils in chronic airway disease: the Copenhagen General Population Study**

Yunus Çolak, MD, PhD; Shoaib Afzal, MD, PhD; Børge G. Nordestgaard, MD, DMSc; Jacob L. Marott, MSc; and Peter Lange, MD, DMSc

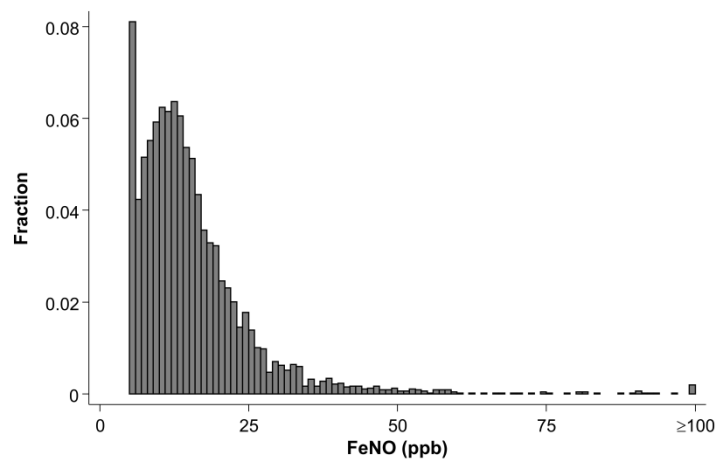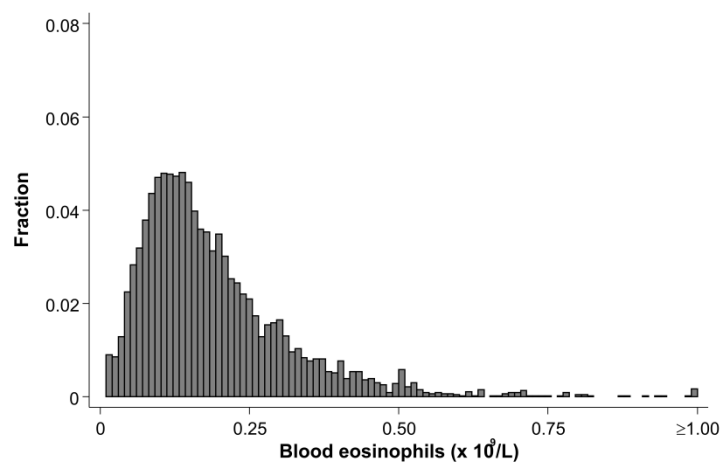

**Figure S1. Distribution of FeNO levels and blood eosinophil counts in the Copenhagen General Population Study.** FeNO = fraction of exhaled nitric oxide.

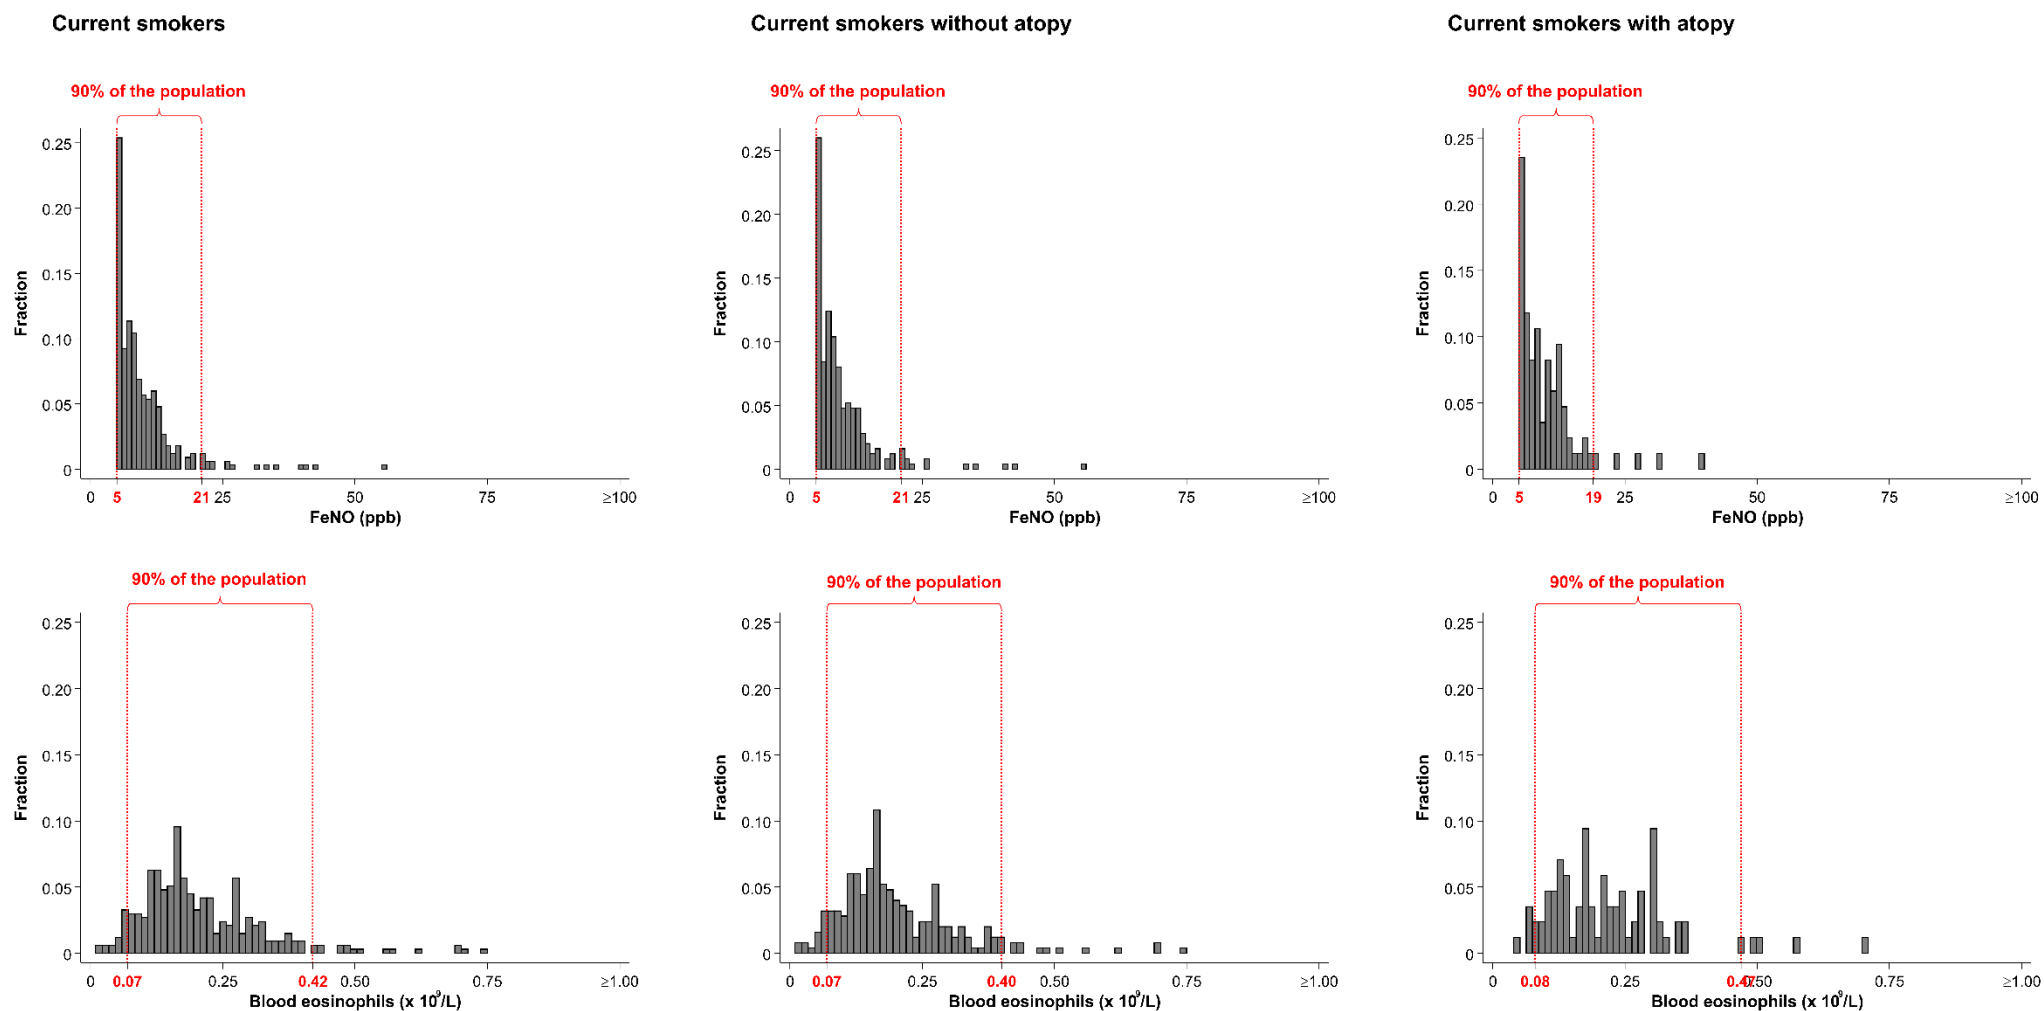

**Figure S2.** Distribution of FeNO levels and blood eosinophil counts in healthy current smokers with and without atopy. FeNO = fraction of exhaled nitric oxide.

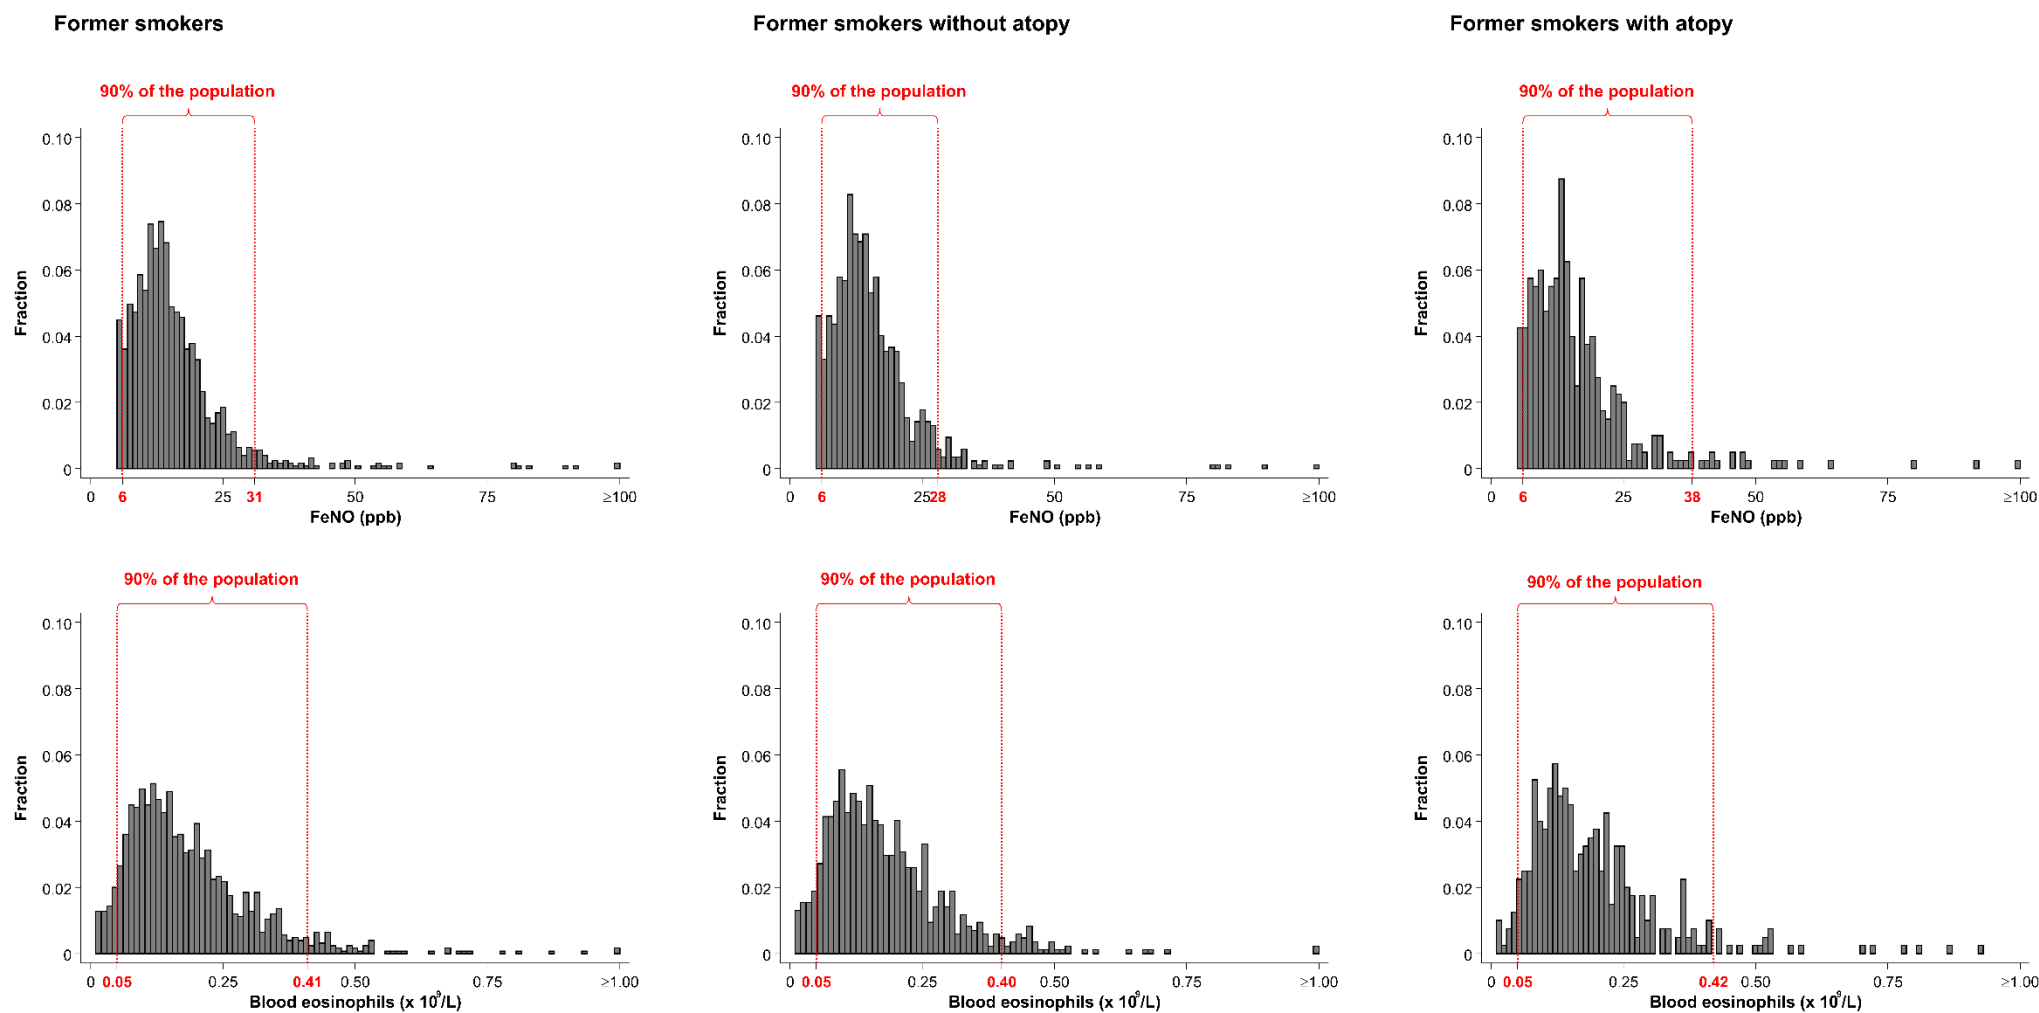

Figure S3. Distribution of FeNO levels and blood eosinophil counts in healthy former smokers with and without atopy. FeNO = fraction of exhaled nitric oxide.

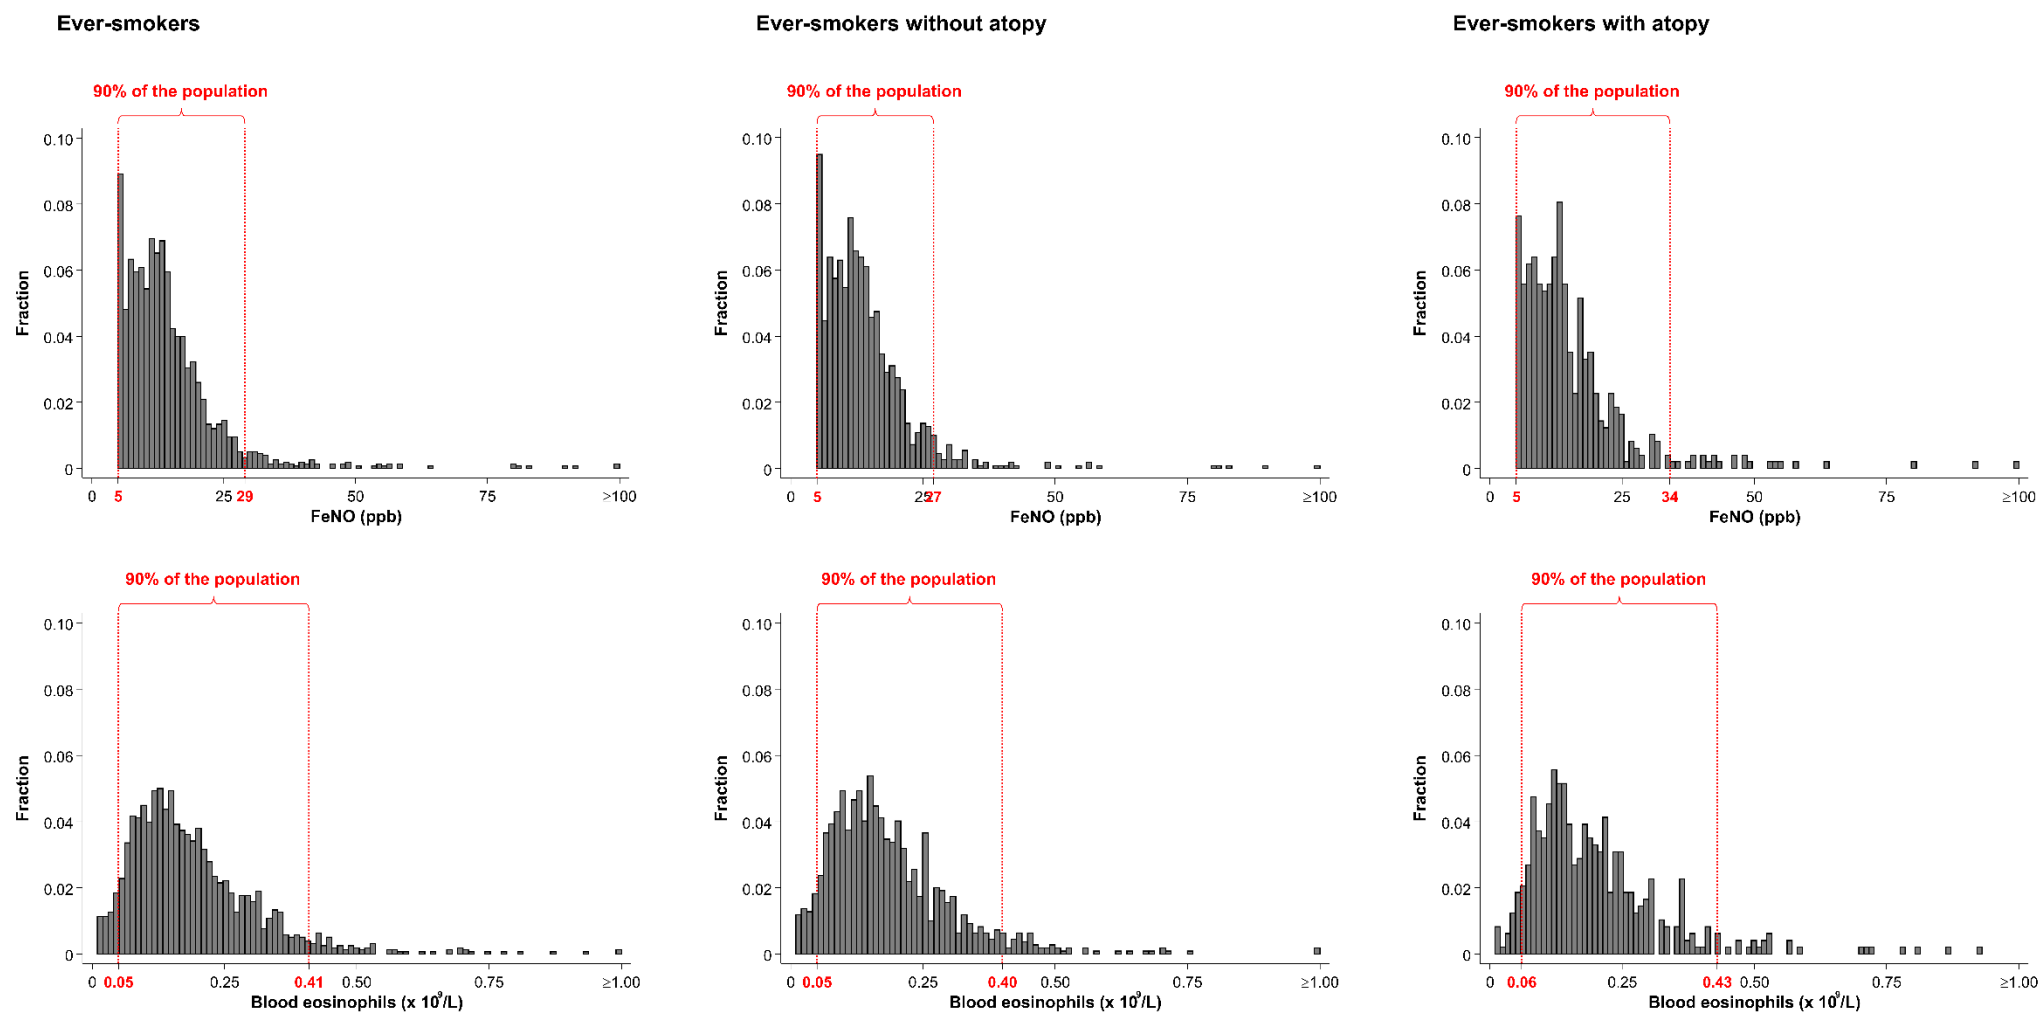

Figure S4. Distribution of FeNO levels and blood eosinophil counts in healthy ever-smokers with and without atopy. FeNO = fraction of exhaled nitric oxide.

A

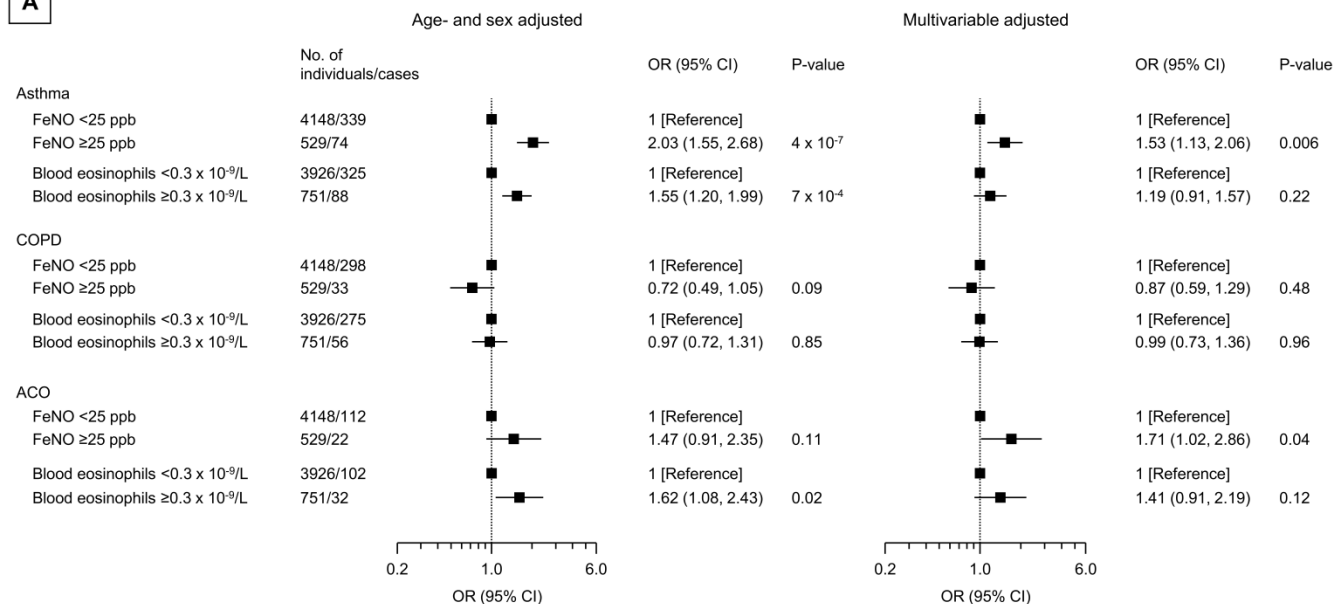

B

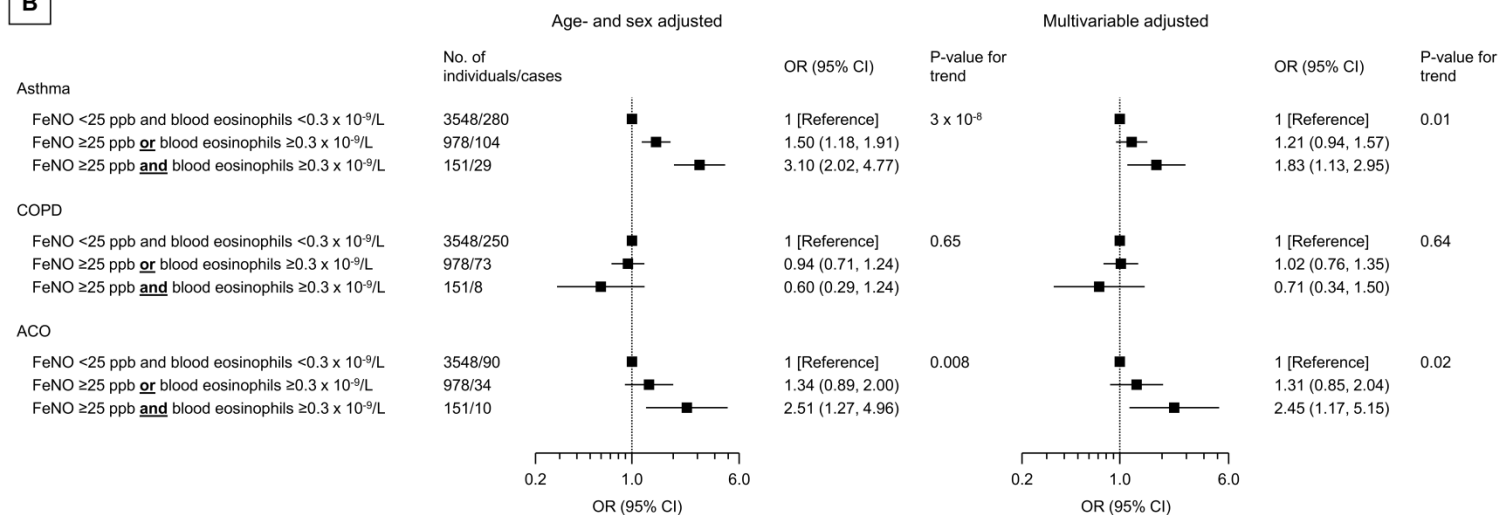

**Figure S5. Association of increased exhaled nitric oxide level and blood eosinophil count with asthma, COPD, and ACO.** The clinical groups of chronic airway disease were defined according to forced expiratory volume in 1 second (FEV<sub>1</sub>)/forced vital capacity (FVC) <lower limit of normal (LLN). *Panel A:* Illustrates the separate association analyses. *Panel B:* Illustrates the combined association analyses. Logistic regression models were used. Multivariable adjustment included age, sex, body mass index, smoking status, smoking history, familial pre-disposition for COPD and asthma, atopy, and use of airway medication. P-values were from Wald's test. ACO: asthma-COPD overlap; CI: confidence interval; COPD: chronic obstructive pulmonary disease; FeNO: fraction of exhaled nitric oxide; OR: odds ratio.
